# Supplementary material for: Lactoferrin Prevents Chronic Alcoholic Injury by Regulating Redox Balance and Lipid Metabolism in Female C57BL/6J Mice
Source: MDPI journal article supplement (doi:10.3390/antiox11081508), 2022-07-31
Supplement: s1 [file s1]

**Supplementary Table S1** Ingredients of the diets

| ingredient (g)      | CON & EtOH | LLf   | HLf   |
|---------------------|------------|-------|-------|
| casein              | 200        | 199.2 | 192   |
| lactoferrin         | 0          | 0.8   | 8     |
| L-cystine           | 3          | 3     | 3     |
| sucrose             | 100        | 100   | 100   |
| cornstarch          | 397.5      | 397.5 | 397.5 |
| dyetrose            | 132        | 132   | 132   |
| soybean oil         | 70         | 70    | 70    |
| cellulose           | 50         | 50    | 50    |
| mineral mix #210025 | 35         | 35    | 35    |
| vitamin mix #310025 | 10         | 10    | 10    |
| choline bitartrate  | 2.5        | 2.5   | 2.5   |
| total               | 1000       | 1000  | 1000  |
| kcal/g              | 4          | 4     | 4     |

CON, control group; EtOH, ethanol intervention group; LLf, low-dose lactoferrin group; HLf, high-dose lactoferrin group.
